# Supplementary material for: The class 3 PI3K coordinates autophagy and mitochondrial lipid catabolism by controlling nuclear receptor PPARα
Source: PubMed Central journal article supplement (PMC6451001; doi:10.1038/s41467-019-09598-9), 2019-04-05

## Supplementary Information

**The class 3 PI3K coordinates autophagy and mitochondrial lipid catabolism  
by controlling nuclear receptor PPAR $\alpha$**

Iershov et al.

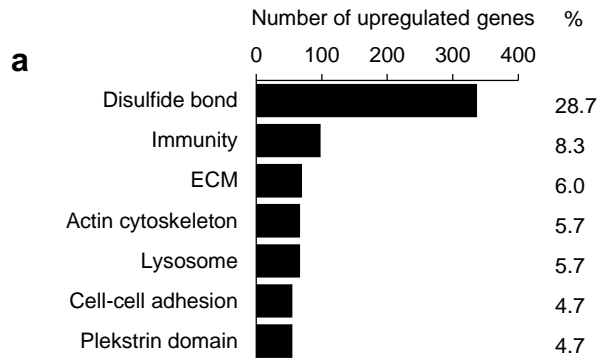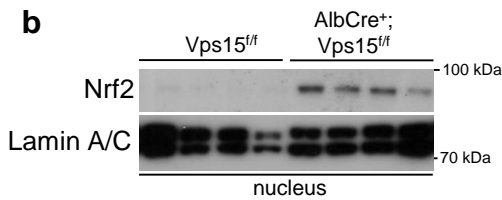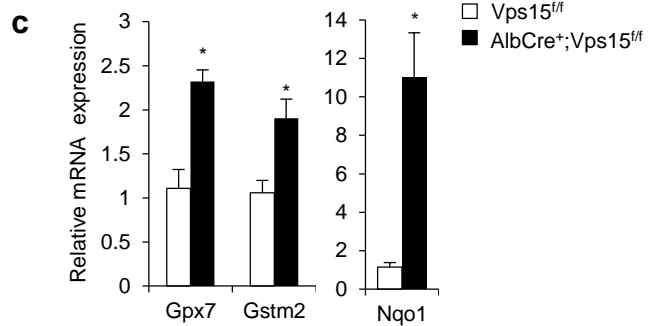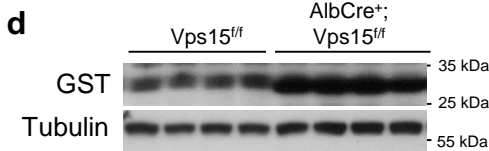

### Supplementary Figure 1. Anti-oxidative stress response in livers of Vps15-LKO mice.

**a** Functional annotation clustering by Database for Annotation, Visualization and Integrated Discovery (DAVID) bioinformatic tool of all significantly upregulated genes in the microarray analyses of liver tissue after acute Vps15 depletion. Percentage of genes among all upregulated genes attributed to listed processes is indicated. Liver tissue was harvested ten days after transduction with adenoviral vectors expressing Cre recombinase to deplete Vps15 or GFP control protein. All significantly modified genes are listed in Supplementary Data 1. Functional annotation clustering results are listed in Supplementary Data 2. **b** Immunoblot analysis of nuclear protein liver extracts of random-fed six week old Vps15<sup>f/f</sup> and AlbCre<sup>+</sup>;Vps15<sup>f/f</sup> using anti-Nrf2 antibody. Immunoblot with LaminA/C antibody served as a loading control. **c** Relative transcript levels of genes implicated in anti-oxidative response in livers of control and Vps15-LKO mice analysed by RT-qPCR. Data are means  $\pm$ SEM (n=8 for Vps15<sup>f/f</sup> n=5 for AlbCre<sup>+</sup>;Vps15<sup>f/f</sup>, P<0.05 \*: vs Vps15<sup>f/f</sup> mice, 2-tailed, unpaired Student's t test). **d** Immunoblot analysis of total protein liver extracts of random-fed six week old Vps15<sup>f/f</sup> and AlbCre<sup>+</sup>;Vps15<sup>f/f</sup> using anti-GST antibody. The immunoblot with anti-tubulin antibody served as a loading control.

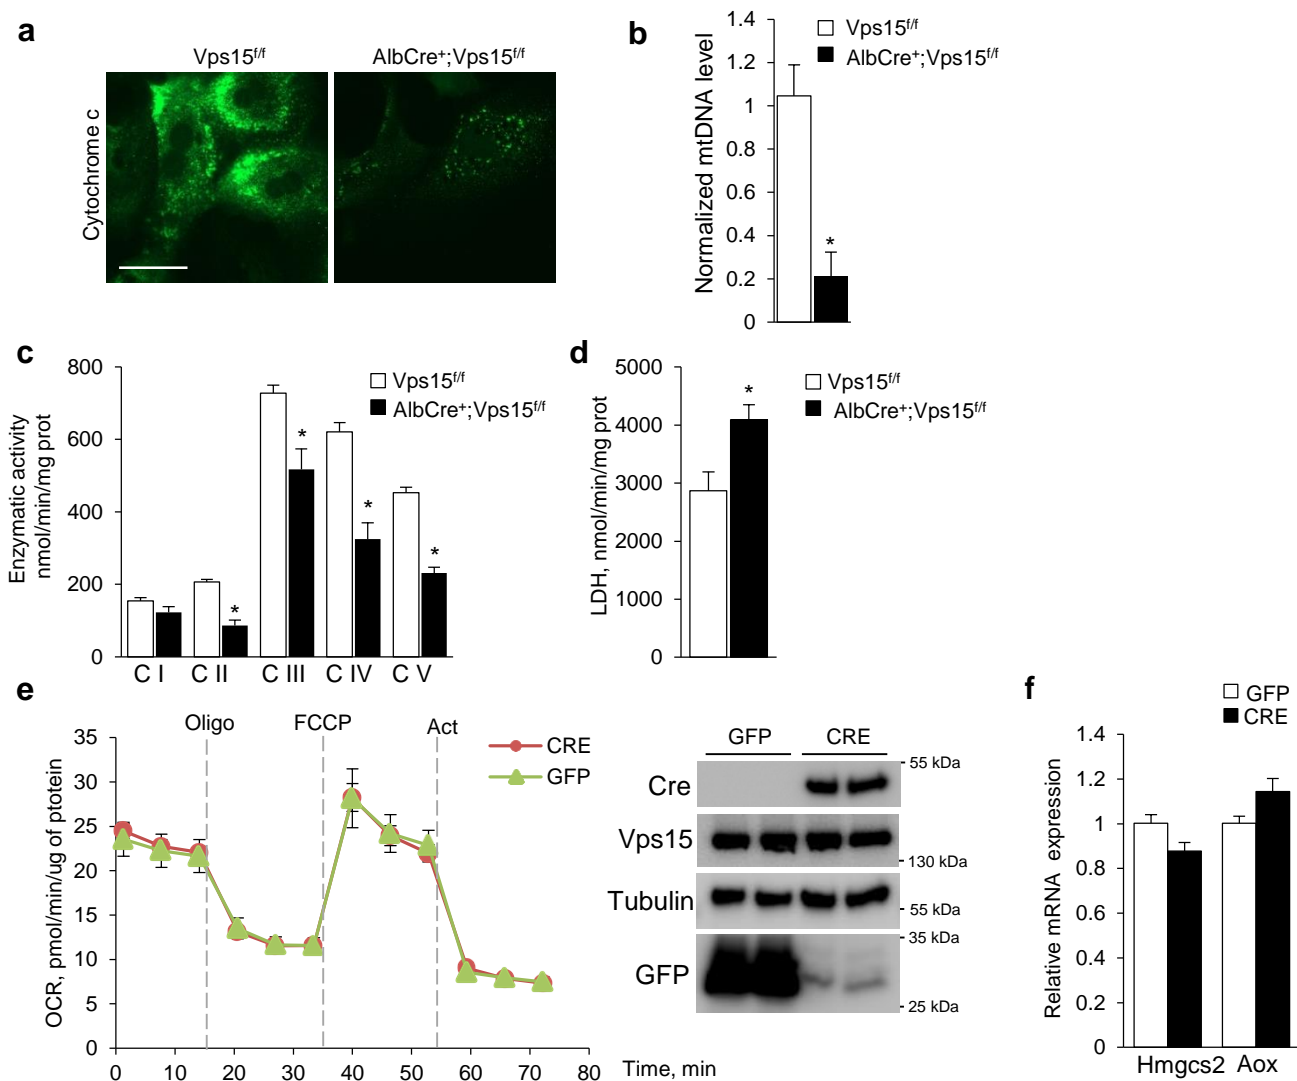

### Supplementary Figure 2. Mitochondrial dysfunction in livers of *Vps15*-LKO mice.

**a** Immunofluorescent analyses of cytochrome c in control and *Vps15*-null primary hepatocytes. Cells were PFA fixed and stained with anti-cytochrome c antibody, secondary anti-rabbit IgG Alexa Fluor 568 antibody was used for detection (images presented in green pseudocolor). Scale bar: 50  $\mu$ m. **b** Mitochondrial versus nuclear DNA was determined by quantitative PCR analysed in total DNA purified from liver tissue of random-fed six week old *Vps15*<sup>f/f</sup> and AlbCre<sup>+</sup>;*Vps15*<sup>f/f</sup> mice. Mitochondrial genome coded CO1 gene served as read-out of mtDNA and  $\beta$ -globin as read-out of nuclear genome (n=7 for *Vps15*<sup>f/f</sup>, n=5 for AlbCre<sup>+</sup>;*Vps15*<sup>f/f</sup>, P<0.05 \*: vs *Vps15*<sup>f/f</sup> mice, 2-tailed, unpaired Student's t test). Enzymatic activities of the respiratory chain complexes (**c**) and lactate dehydrogenase activity (**d**) were measured in liver tissue extracts of random-fed six week old *Vps15*<sup>f/f</sup> and AlbCre<sup>+</sup>;*Vps15*<sup>f/f</sup> mice. Data are means  $\pm$ SEM (n=4 for *Vps15*<sup>f/f</sup> and AlbCre<sup>+</sup>;*Vps15*<sup>f/f</sup>, P<0.05 \*: vs *Vps15*<sup>f/f</sup> mice, 2-tailed, unpaired Student's t test). **e** The OCR measured by Seahorse Bioanalyzer in primary hepatocytes from wild-type mice transduced with adenoviral vectors expressing Cre or GFP measured 48 hours post-infection. First, OCR under basal conditions (initial rates) and then in response to sequential treatment with Oligomycin, FCCP, and Rotenone/Antimycin A is depicted. Representative experiment of three independent hepatocyte cultures is presented. Dashed lines indicate the time of the addition of each reagent. Right panel shows the control immunoblot analysis of total protein extracts of hepatocytes using indicated antibodies. **f** Relative transcript levels of indicated genes in primary hepatocytes treated as in (e). Data are means  $\pm$ SEM, n=3.

**a**

| Transcription factor | Enrichment | Gene overlap among downregulated genes | Sample type | Adjusted p-value | PubMed ID |
|----------------------|------------|----------------------------------------|-------------|------------------|-----------|
| RXR                  | 0.192      | 384/2000                               | Liver       | 1.02E-101        | 22158963  |
| PPARA                | 0.173      | 346/2000                               | Liver       | 4.06E-77         | 22158963  |
| LXR                  | 0.163      | 326/2000                               | Liver       | 2.33E-65         | 22158963  |
| ESR1                 | 0.241      | 107/444                                | Liver       | 5.92E-34         | 17901129  |
| EGR1                 | 0.123      | 116/944                                | Liver       | 2.22E-11         | 23403033  |
| NR1H2                | 0.118      | 111/939                                | Liver       | 7.77E-10         | 20693526  |
| FOXO1                | 0.156      | 54/347                                 | Liver       | 1.48E-08         | 23066095  |
| HNF4A                | 0.075      | 459/6083                               | HepG2       | 5.91E-07         | 19822575  |
| CEBPA                | 0.122      | 72/589                                 | Liver       | 7.35E-07         | 23403033  |
| CLOCK                | 0.135      | 55/407                                 | 293T        | 1.28E-06         | 20551151  |
| PPARG                | 0.151      | 41/272                                 | 3T3-L1      | 3.73E-06         | 19300518  |
| ESRRB                | 0.084      | 121/1434                               | MECS        | 5.78E-03         | 18555785  |
| FOXO2                | 0.076      | 226/2968                               | HepG2       | 5.78E-03         | 19822575  |
| SREBP2               | 0.085      | 93/1095                                | Liver       | 2.70E-02         | 21459322  |
| TAF7L                | 0.087      | 79/912                                 | C3H10T1     | 3.68E-02         | 23326641  |

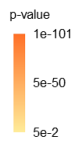

| Transcription factor | Enrichment | Gene overlap among upregulated genes | Sample type          | Adjusted p-value | PubMed ID |
|----------------------|------------|--------------------------------------|----------------------|------------------|-----------|
| MYB                  | 0.200      | 185/923                              | ERMVYB               | 4.00E-35         | 21317192  |
| MECOM                | 0.149      | 291/1951                             | KASUMI               | 8.68E-32         | 23826213  |
| IRF8                 | 0.144      | 287/2000                             | BMDM                 | 1.85E-28         | 27001747  |
| NCOR                 | 0.140      | 280/2000                             | Macrophages          | 5.65E-26         | 22465074  |
| SMRT                 | 0.130      | 260/2000                             | Macrophages          | 3.31E-19         | 22465074  |
| Nrf2                 | 0.140      | 186/1331                             | Macrophages          | 2.10E-16         | 26677805  |
| BRD4                 | 0.120      | 240/2000                             | AML                  | 2.13E-13         | 27068464  |
| EKLF                 | 0.133      | 165/1239                             | Erythrocyte          | 1.41E-12         | 21900194  |
| IRF8                 | 0.194      | 62/319                               | J774                 | 7.93E-11         | 21731497  |
| NR1H3                | 0.157      | 94/599                               | Atherosclerotic foam | 8.79E-11         | 23393188  |
| SOX2                 | 0.113      | 224/1991                             | MEF                  | 1.04E-09         | 18692474  |
| SPI1                 | 0.116      | 195/1676                             | GC-B                 | 1.38E-09         | 22096565  |
| NUCKS1               | 0.151      | 89/588                               | Hepatocytes          | 1.98E-09         | 24931609  |
| SPI1                 | 0.111      | 217/1962                             | Erythroleukemia      | 8.77E-09         | 22790984  |
| SPI1                 | 0.101      | 322/3198                             | NB4                  | 1.22E-08         | 23547873  |

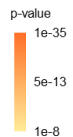**b**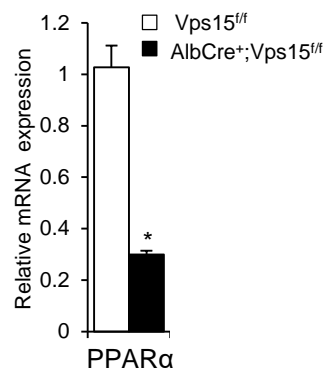**c**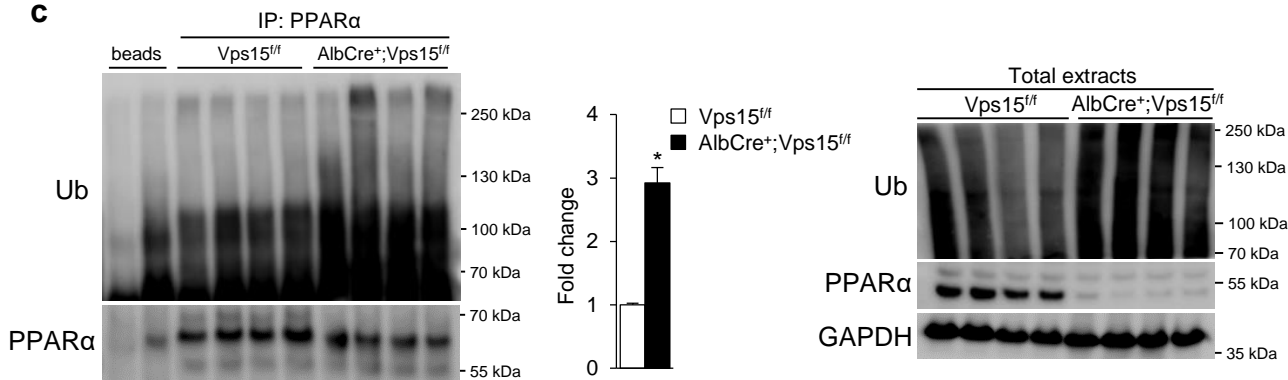**d**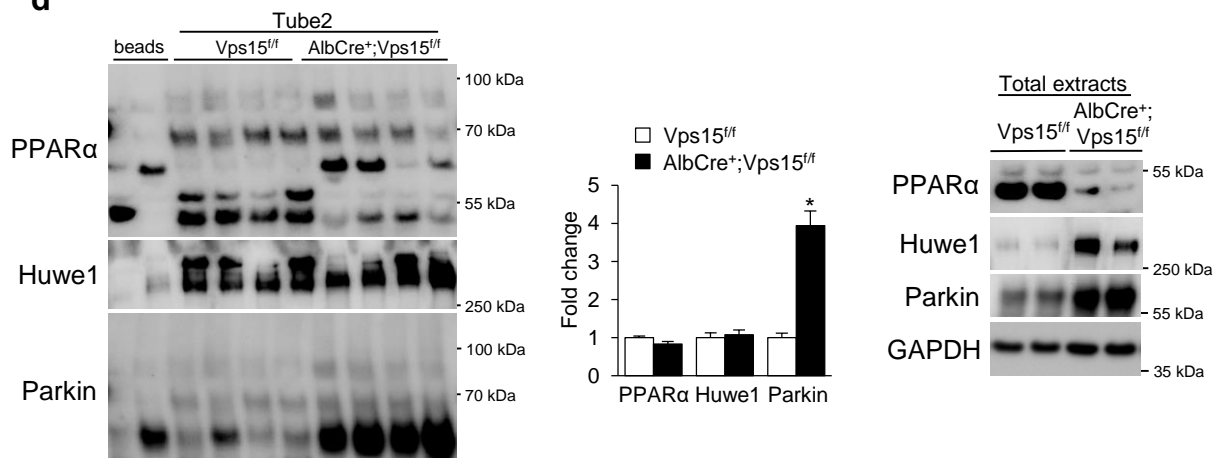

**Supplementary Figure 3. PPAR $\alpha$  protein poly-ubiquitination is induced in livers of Vps15-LKO mice.**

**a** Bioinformatic analyses using EnrichR tool shows enrichment for transcription factors for the downregulated (upper table) and upregulated (lower table) genes in livers of Vps15-LKO mice. Adjusted p-value – p-value computed using the Fisher exact test and adjusted for multiple comparisons (the colour of the cell indicates the significance from red to yellow). **b** Relative transcript levels of PPAR $\alpha$  gene in livers of control and Vps15-LKO mice analysed by RT-qPCR. Data are means  $\pm$ SEM (n=8 for Vps15<sup>fl/fl</sup>, n=5 for AlbCre<sup>+</sup>;Vps15<sup>fl/fl</sup>, P<0.05 \*: vs Vps15<sup>fl/fl</sup> mice, 2-tailed, unpaired Student's t test). **c** Endogenous PPAR $\alpha$  was pulled-down using anti-PPAR $\alpha$  antibodies from total liver extract of six week old random-fed Vps15<sup>fl/fl</sup> and AlbCre<sup>+</sup>;Vps15<sup>fl/fl</sup>. The precipitation without antibodies served as a control of non-specific binding. Immunoblot analyses with indicated antibodies revealed increased ubiquitination of PPAR $\alpha$  pulled-down from the livers of Vps15-LKO mice as compared to wild-type mice (left panel). Densitometric analyses of ubiquitin signal normalized to PPAR $\alpha$  signal presented as folds over Vps15<sup>fl/fl</sup> condition (middle panel). Data are means  $\pm$ SEM, n=4, P<0.05 \*: vs Vps15<sup>fl/fl</sup> mice, 2-tailed, unpaired Student's t-test. Immunoblot analysis of total protein liver extracts used for immunoprecipitation with indicated antibodies is presented on right panel. Immunoblot with GAPDH antibody served as a loading control. **d** Endogenous PPAR $\alpha$ , Huwe1 and Parkin proteins were pulled-down on Tube2 agarose from total liver extract of six week old random-fed Vps15<sup>fl/fl</sup> and AlbCre<sup>+</sup>;Vps15<sup>fl/fl</sup> (left panel). The precipitation with control agarose beads served as a control of non-specific binding. Densitometric analyses of indicated protein levels presented as folds over Vps15<sup>fl/fl</sup> condition (middle panel). Data are means  $\pm$ SEM, n=4, P<0.05 \*: vs Vps15<sup>fl/fl</sup> mice, 2-tailed, unpaired Student's t-test. Immunoblot analysis of total protein liver extracts used for pull-down using indicated antibodies is presented on right panel. Immunoblot with GAPDH antibody served as a loading control.

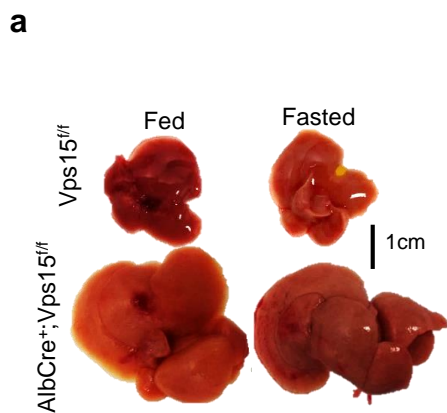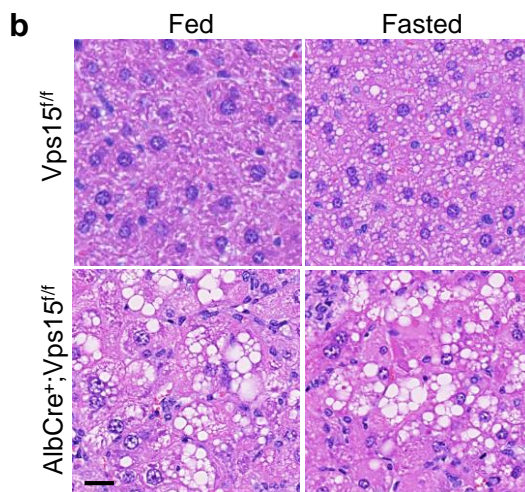

□ Vps15<sup>fl/fl</sup> /Fed  
 ■ Vps15<sup>fl/fl</sup> /Fasted  
 ■ AlbCre<sup>+</sup>;Vps15<sup>fl/fl</sup> /Fed  
 ■ AlbCre<sup>+</sup>;Vps15<sup>fl/fl</sup> /Fasted

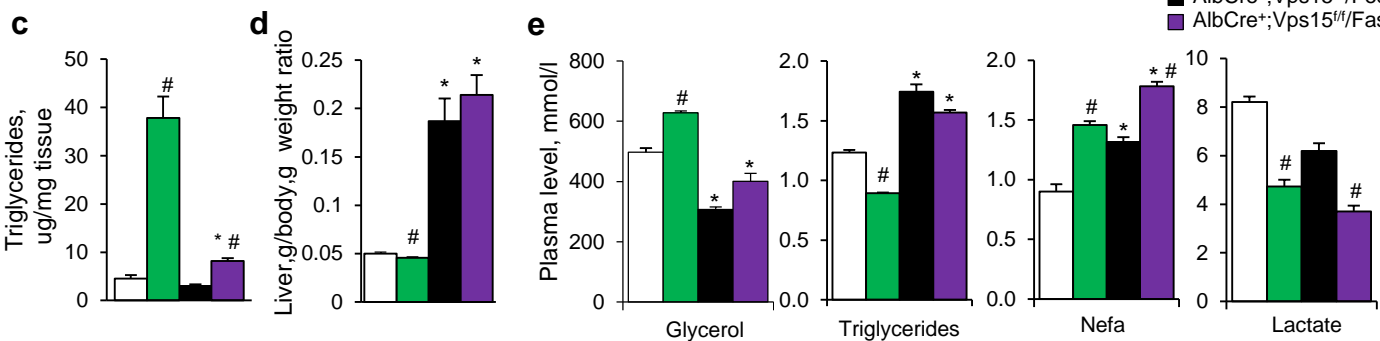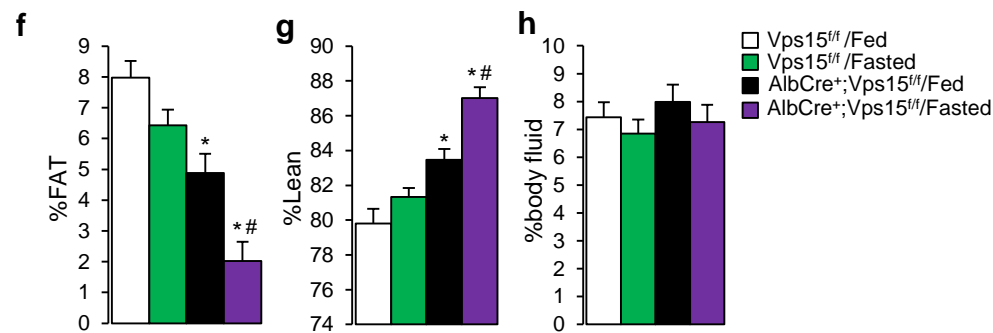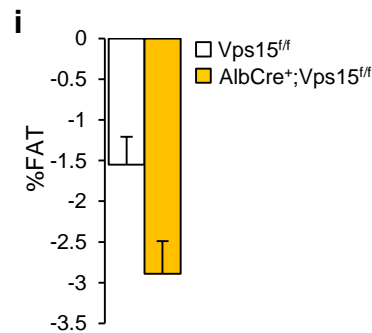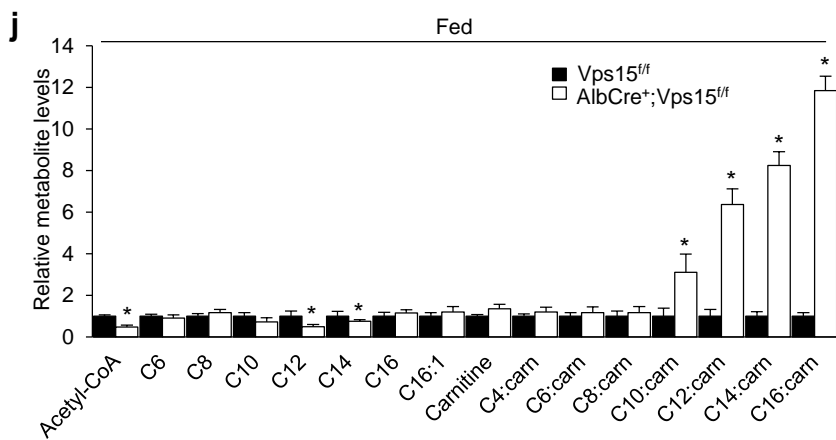

#### **Supplementary Figure 4. Fasting phenotypes of Vps15-LKO mice.**

**a** Macroscopic view of livers of six week old random-fed and 24-hour fasted Vps15<sup>ff</sup> and AlbCre<sup>+</sup>;Vps15<sup>ff</sup> mice. **b** HE stained liver sections of mice treated as in (a). Scale bar: 10 μm. **c** Triglyceride content measured enzymatically in livers of six week old random-fed or 24 hour fasted prior to sacrifice Vps15<sup>ff</sup> and AlbCre<sup>+</sup>;Vps15<sup>ff</sup> mice. Data are means ±SEM (n=6 for Vps15<sup>ff</sup>, n=4-5 for AlbCre<sup>+</sup>;Vps15<sup>ff</sup>, P<0.05 \*: vs Vps15<sup>ff</sup>, #: vs fed, 2-tailed, unpaired Student's t test). **d** Liver weight to body weight ratio was determined in six week old random-fed and 24 hour fasted Vps15<sup>ff</sup> and AlbCre<sup>+</sup>;Vps15<sup>ff</sup> mice. Data are means ±SEM (Data are means ±SEM (n=6 for Vps15<sup>ff</sup>, n=4-5 for AlbCre<sup>+</sup>;Vps15<sup>ff</sup>, P<0.05 \*: vs Vps15<sup>ff</sup>, #: vs fed, 2-tailed, unpaired Student's t test). **e** Plasma metabolite analyses in mice treated as in (a). Data are means ±SEM (Data are means ±SEM (n=6 for Vps15<sup>ff</sup>, n=4-5 for AlbCre<sup>+</sup>;Vps15<sup>ff</sup>, P<0.05 \*: vs Vps15<sup>ff</sup>, #: vs fed, 2-tailed, unpaired Student's t test). Graphs showing the percentage of fat mass (**f**), lean mass (**g**) and body fluid (**h**) determined by DEXA scan of six week old random-fed and 24 hour fasted Vps15<sup>ff</sup> and AlbCre<sup>+</sup>;Vps15<sup>ff</sup> mice. Mice were fasted after the measurements in random-fed state were performed. Data are means ±SEM (n=4 for Vps15<sup>ff</sup>, n=5 for AlbCre<sup>+</sup>;Vps15<sup>ff</sup>, P<0.05 \*: vs Vps15<sup>ff</sup>, #: vs fed, 2-tailed, unpaired Student's t test). **i** The graph showing the loss of fat mass upon 24 hour fasting determined by DEXA scan of six week old Vps15<sup>ff</sup> and AlbCre<sup>+</sup>;Vps15<sup>ff</sup> mice. Data are means ±SEM (n=4 for Vps15<sup>ff</sup>, n=5 for AlbCre<sup>+</sup>;Vps15<sup>ff</sup>, P<0.05 \*: vs Vps15<sup>ff</sup>, 2-tailed, unpaired Student's t test). **j** Relative levels of free fatty acids, Acetyl-CoA, free carnitine and Acyl-carnitine metabolites in livers of random-fed Vps15<sup>ff</sup> and AlbCre<sup>+</sup>;Vps15<sup>ff</sup> mice measured by mass spectrometry. Data are means ±SEM (n=4, P<0.05 \*: vs Vps15<sup>ff</sup>, 2-tailed, unpaired Student's t test).

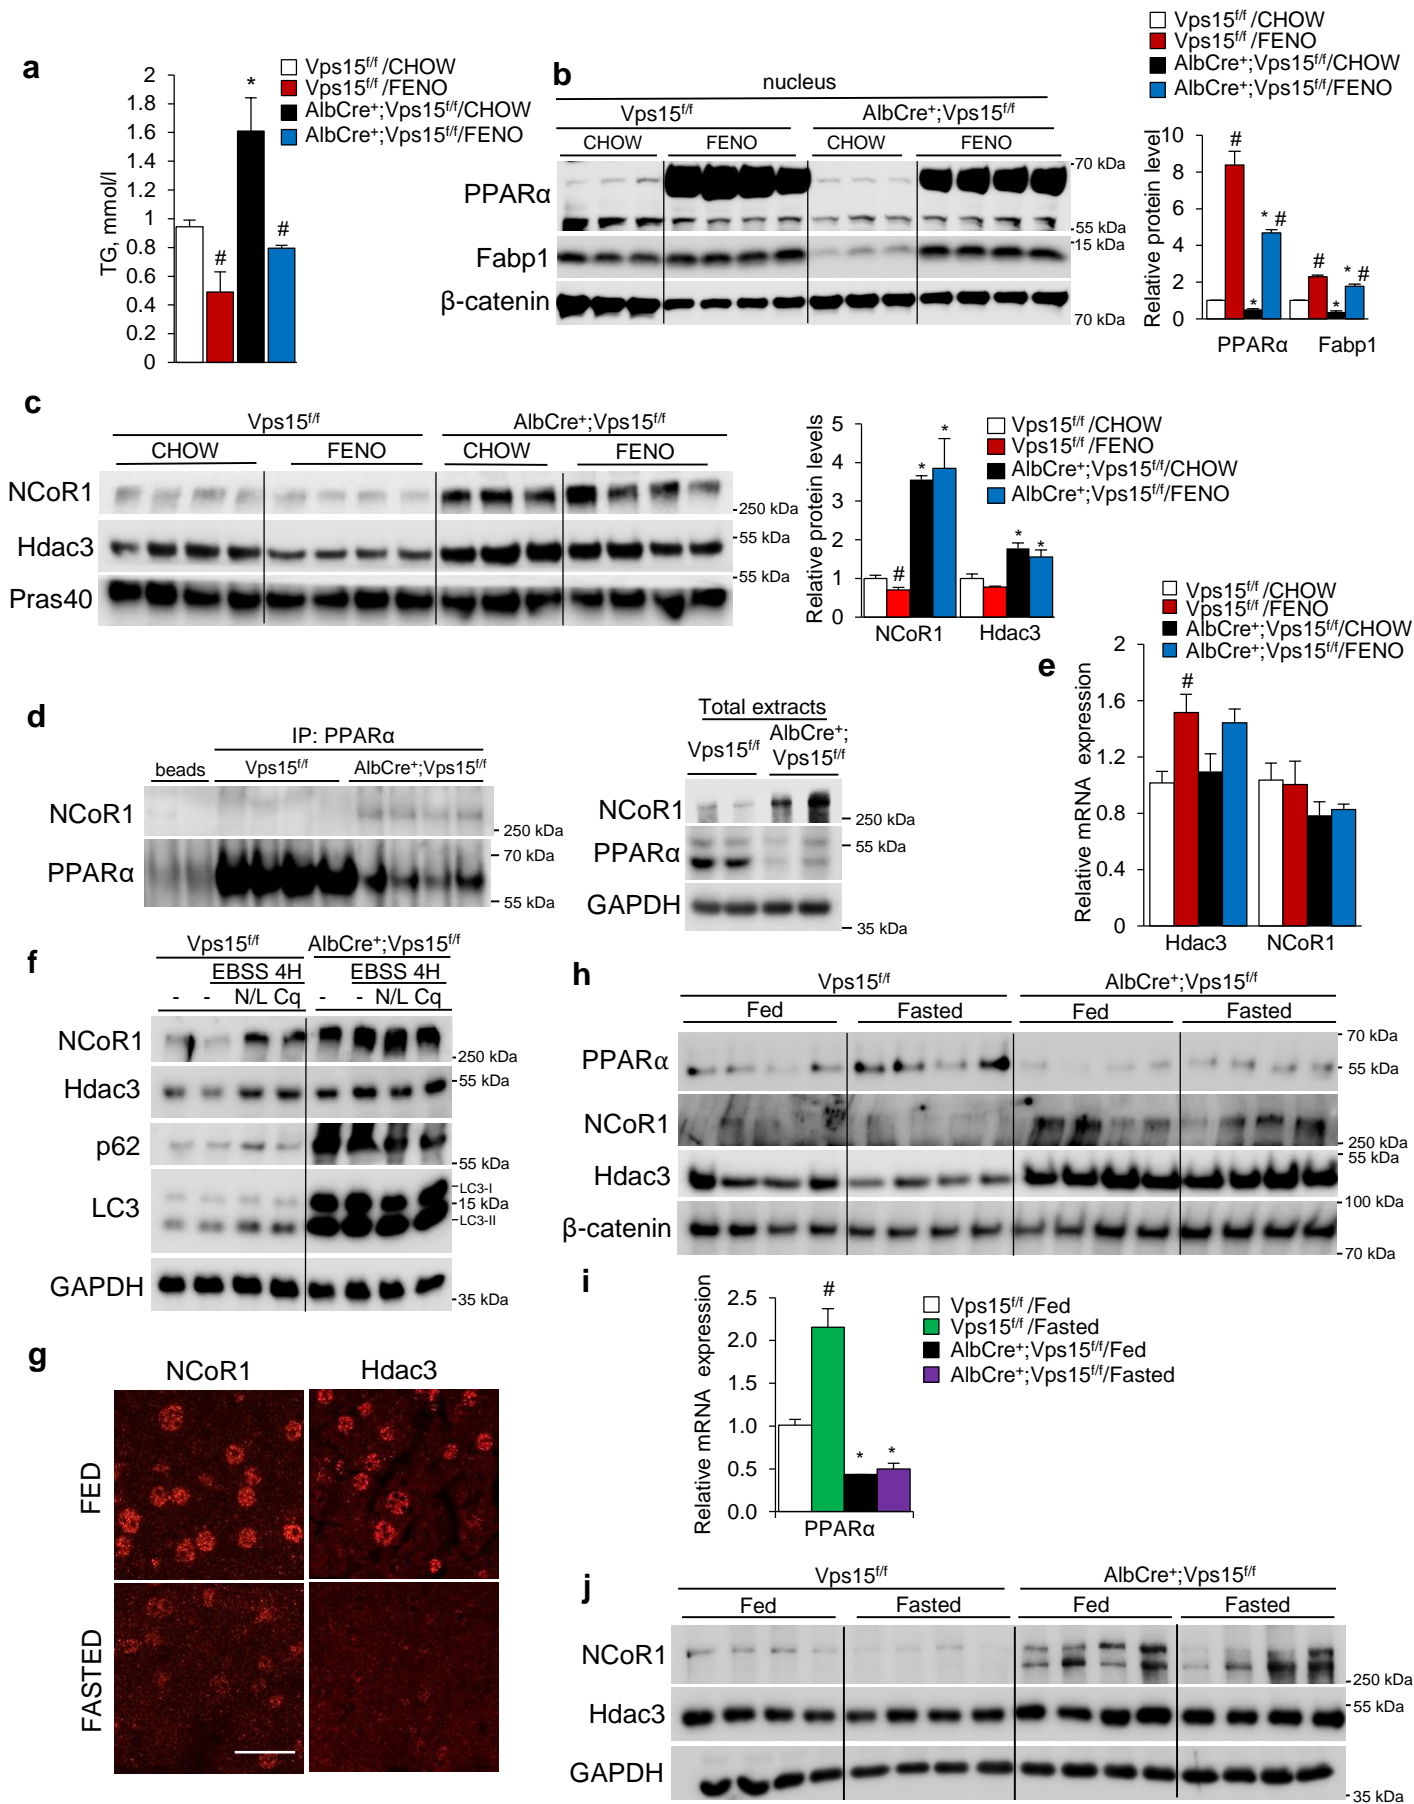



## Supplementary Figure 5. Fenofibrate treatment rescues PPAR $\alpha$ activity in livers of Vps15-LKO mice.

**a** The biochemical analyses of triglycerides in plasma of random-fed Vps15<sup>ff</sup> and AlbCre<sup>+</sup>;Vps15<sup>ff</sup> mice that were treated for two weeks with fenofibrate incorporated in food or control chow food. Data are means  $\pm$ SEM (n=4 for Vps15<sup>ff</sup> chow and FENO group, n=3 for AlbCre<sup>+</sup>;Vps15<sup>ff</sup> chow and n=4 for AlbCre<sup>+</sup>;Vps15<sup>ff</sup> FENO group, P<0.05 \*: vs Vps15<sup>ff</sup>, #: vs chow, 2-tailed, unpaired Student's t test). **b** Immunoblot analysis of nuclear protein liver extracts of mice treated as in (a) using indicated antibodies. Densitometric analyses of protein levels normalised to  $\beta$ -catenin levels presented as folds over Vps15<sup>ff</sup>-chow condition. Data are means  $\pm$ SEM (n=4 for Vps15<sup>ff</sup> chow and FENO group, n=3 for AlbCre<sup>+</sup>;Vps15<sup>ff</sup> chow and n=4 for AlbCre<sup>+</sup>;Vps15<sup>ff</sup> FENO group, P<0.05 \*: vs Vps15<sup>ff</sup>, #: vs chow, 2-tailed, unpaired Student's t test). **c** Immunoblot analysis of total protein liver extracts of mice treated as in (a) using indicated antibodies. Densitometric analyses of protein levels normalised to Pras40 levels presented as folds over Vps15<sup>ff</sup>-chow condition. Data are means  $\pm$ SEM (n=4 for Vps15<sup>ff</sup> chow and FENO group, n=3 for AlbCre<sup>+</sup>;Vps15<sup>ff</sup> chow and n=4 for AlbCre<sup>+</sup>;Vps15<sup>ff</sup> FENO group, P<0.05 \*: vs Vps15<sup>ff</sup>, #: vs chow, 2-tailed, unpaired Student's t test). **d** Endogenous PPAR $\alpha$  was pulled-down using anti-PPAR $\alpha$  antibodies from total liver extract of six week old random-fed Vps15<sup>ff</sup> and AlbCre<sup>+</sup>;Vps15<sup>ff</sup> mice. The precipitation without antibodies served as a control of non-specific binding. Immunoblot analyses with indicated antibodies revealed increased association between PPAR $\alpha$  and NCoR1 in livers of Vps15-LKO mice compared to control mice (left panel). Immunoblot analysis of total protein liver extracts used for immunoprecipitation with indicated antibodies (right panel). Immunoblot with GAPDH antibody served as a loading control. **e** Relative mRNA expression levels of co-repressors in the livers of random-fed mice treated as in (a). Data are means  $\pm$ SEM (Vps15<sup>ff</sup> (n=6 and n=4 for chow and FENO group), AlbCre<sup>+</sup>;Vps15<sup>ff</sup> (n=5 and n=4 for chow and FENO group), P<0.05 \*: vs Vps15<sup>ff</sup>, #: vs chow, 2-tailed, unpaired Student's t test). **f** Immunoblot analysis of total protein liver extracts of *ex vivo* autophagic flux experiment in six week old Vps15<sup>ff</sup> and AlbCre<sup>+</sup>;Vps15<sup>ff</sup> mice using indicated antibodies. The livers were perfused with PBS solution, dissected and minced. The tissue was incubated during four hours at +37°C in complete media or in EBSS solution supplemented with lysosomal inhibitors NH<sub>4</sub>Cl+Leupeptin (20mM+200 $\mu$ M) or Chloroquine (500 $\mu$ M). Tissue was collected by brief centrifugation and washed once with PBS before proceeding with total protein extraction. Immunoblot with anti-LC3 antibody served as a control of lysosomal inhibition (accumulation of LC3-II protein) and anti-GAPDH as a loading control. **g** Representative images of immunofluorescent analyses showing nuclear localization of NCoR1 and Hdac3 in liver tissue of wild-type mice fasted for 24 hours. Secondary anti-rabbit IgG Alexa Fluor 568 antibody was used for detection. Scale bar: 40  $\mu$ m. **h** Immunoblot analysis of nuclear protein liver extracts of six week old random-fed or 24 hour fasted prior to sacrifice Vps15<sup>ff</sup> and AlbCre<sup>+</sup>;Vps15<sup>ff</sup> mice using indicated antibodies. The immunoblot with anti- $\beta$ -catenin antibody served as a loading control. **i** Relative transcript levels of PPAR $\alpha$  gene in livers of control and Vps15-LKO mice treated as in (h) analysed by RT-qPCR. Data are means  $\pm$ SEM (n=6 for Vps15<sup>ff</sup>, n=4-5 for AlbCre<sup>+</sup>;Vps15<sup>ff</sup>, P<0.05 \*: vs Vps15<sup>ff</sup>, #: vs fed, 2-tailed, unpaired Student's t test). **j** Immunoblot analysis of total protein liver extracts of six week old random-fed or 24 hour fasted prior to sacrifice Vps15<sup>ff</sup> and AlbCre<sup>+</sup>;Vps15<sup>ff</sup> mice using indicated antibodies. The immunoblot with anti-GAPDH antibody served as a loading control.

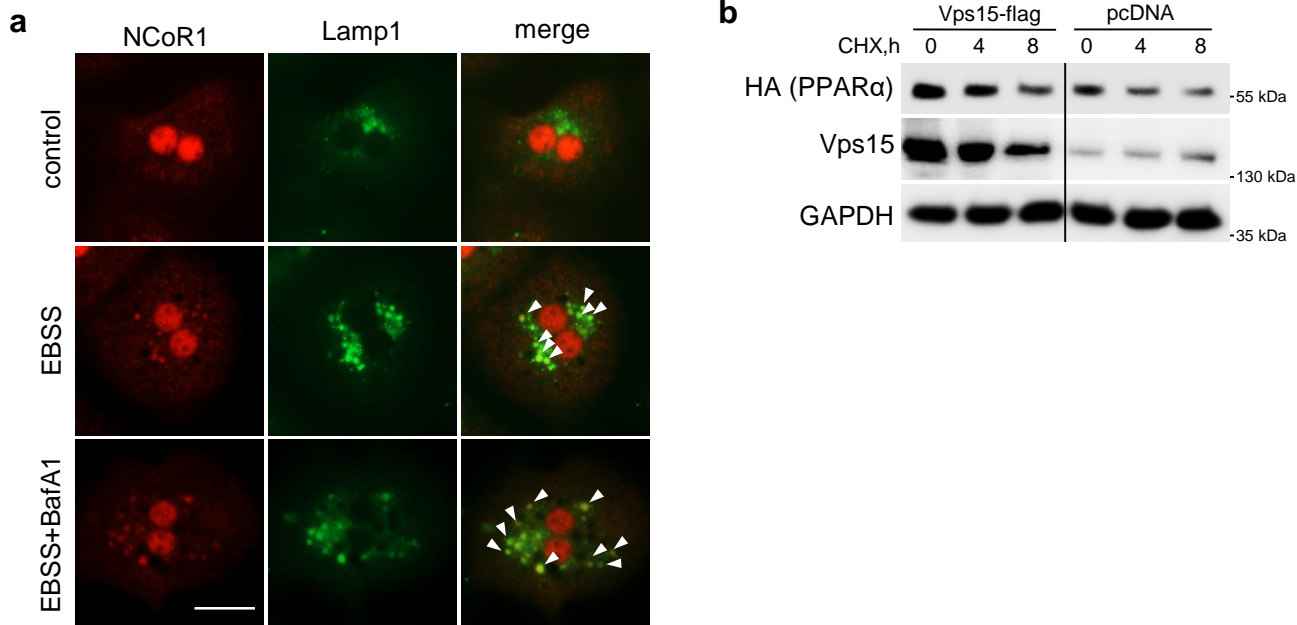

### Supplementary Figure 6. PPAR $\alpha$ regulation by Vps15.

**a** Immunofluorescent analyses of NCoR1 and Lamp1 proteins in control primary hepatocytes. Cells were PFA fixed and co-stained with primary antibodies, secondary anti-rabbit IgG Alexa Fluor 568 and anti-rat IgG Alexa Fluor 488 antibodies were used for detection. The white arrowheads indicate double-positive cytosolic structures. Scale bar: 40  $\mu$ m. **b** Immunoblot analysis of ectopically expressed HA-tagged PPAR $\alpha$  protein in HEK293 cells transfected with empty vector or with vector expressing Vps15-Flag. 24 hour post-transfection cells were treated for indicated times with cycloheximide (100 $\mu$ g/ml). Immunoblot with anti-GAPDH antibody served as a loading control.

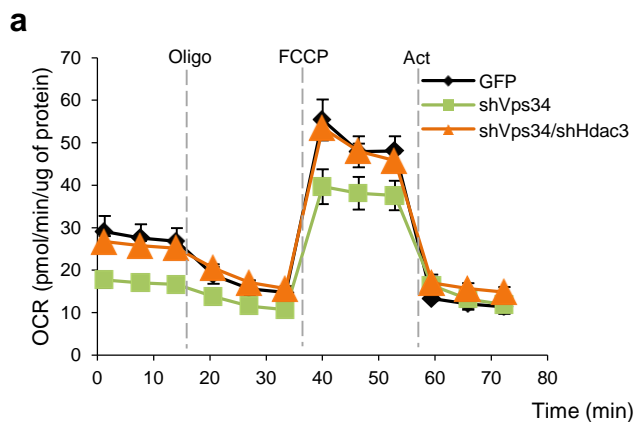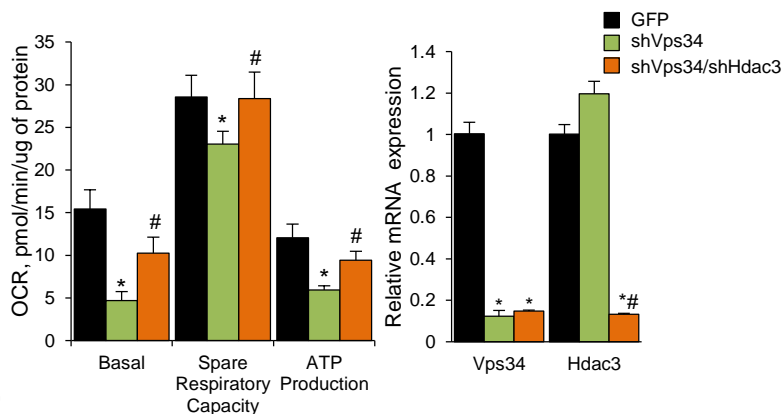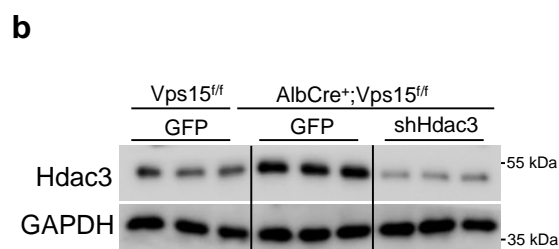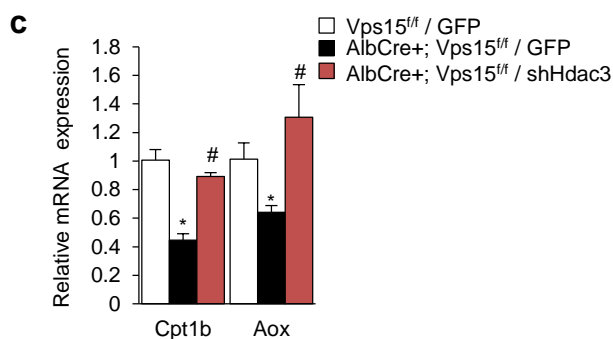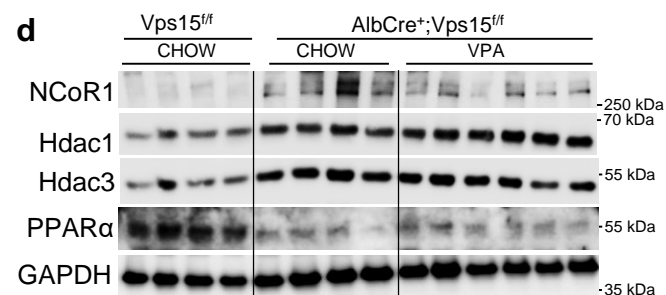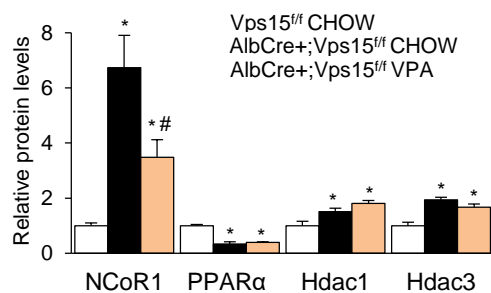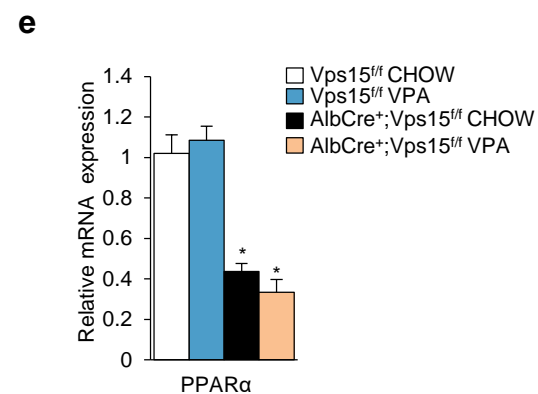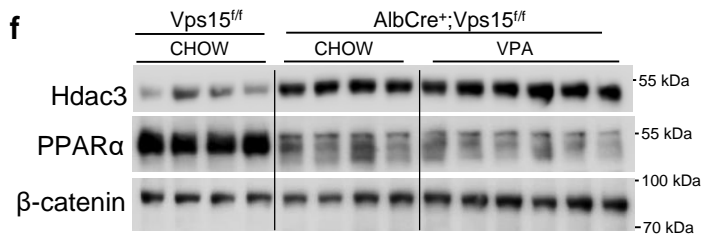

### Supplementary Figure 7. Hdac inhibition partially restores PPAR $\alpha$ activity.

**a** The oxygen consumption rate measured by SeaHorse Bioanalyzer in primary hepatocytes isolated from wild-type mice 48 hours post-transduction with adenoviral vectors expressing GFP, shRNAVps34 or shRNAVps34+shRNAHdac3 under basal conditions (initial rates) and in response to sequential treatment with Oligomycin (respiration associated with ATP production), FCCP (maximal respiration), and Rotenone/Antimycin A (non-mitochondrial respiration). Dashed lines indicate the time of the addition of each reagent. Representative experiment of three independent hepatocyte cultures is presented. Quantification of basal respiration, ATP production and maximal respiratory capacity are shown on the graphs (middle panel). Relative mRNA expression levels of *Vps34* and *Hdac3* showing the level of knockdown of transcripts of indicated genes is shown on right panel. Data are means  $\pm$ SEM ( $P < 0.05$  \*: vs GFP-infected cells, #: vs shRNAVps34-infected cells, 2-tailed, unpaired Student's t test).

**b** Immunoblot analysis of Hdac3 levels in total protein extracts of primary hepatocytes 36 hours post-transduction with adenoviral vectors expressing shRNAHdac3 or GFP as a control. Immunoblot with anti-GAPDH antibody served as a loading control. **c** Relative transcript levels of indicated genes in primary hepatocytes treated as in (b). Data are means  $\pm$ SEM ( $n=3$ ,  $P < 0.05$  \*: vs GFP, unpaired Student's t test). **d** Immunoblot analysis of total protein liver extracts of six week old random-fed *Vps15<sup>ff</sup>* and *AlbCre<sup>+</sup>;Vps15<sup>ff</sup>* mice that were treated for two weeks with VPA incorporated in food or control chow food using indicated antibodies. Densitometric analyses of protein levels normalised to GAPDH levels presented as folds over *Vps15<sup>ff</sup>*-chow condition. Data are means  $\pm$ SEM ( $n=4$  for *Vps15<sup>ff</sup>* and *AlbCre<sup>+</sup>;Vps15<sup>ff</sup>* chow,  $n=6$  *AlbCre<sup>+</sup>;Vps15<sup>ff</sup>* VPA,  $P < 0.05$  \*: vs *Vps15<sup>ff</sup>*, #: vs chow, 2-tailed, unpaired Student's t test). **e** Relative mRNA expression levels of PPAR $\alpha$  in the livers of mice treated as in (d). Data are means  $\pm$ SEM ( $n=6$  for *Vps15<sup>ff</sup>* and *AlbCre<sup>+</sup>;Vps15<sup>ff</sup>* chow,  $n=5$  *Vps15<sup>ff</sup>* VPA,  $n=6$  *AlbCre<sup>+</sup>;Vps15<sup>ff</sup>* VPA,  $P < 0.05$  \*: vs *Vps15<sup>ff</sup>*, #: vs chow, 2-tailed, unpaired Student's t test). **f** Immunoblot analysis of nuclear extracts from the liver tissue of mice treated as in (d) using indicated antibodies. The immunoblot with anti- $\beta$ -catenin antibody served as a loading control.

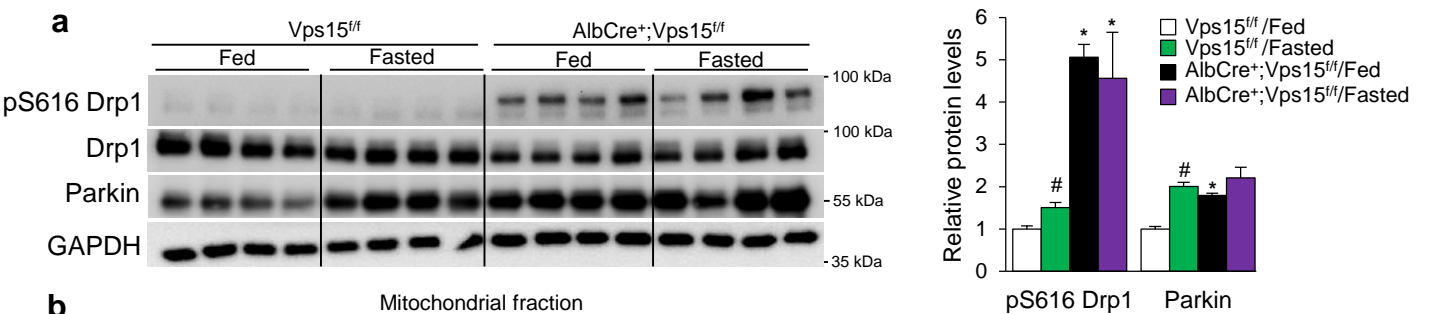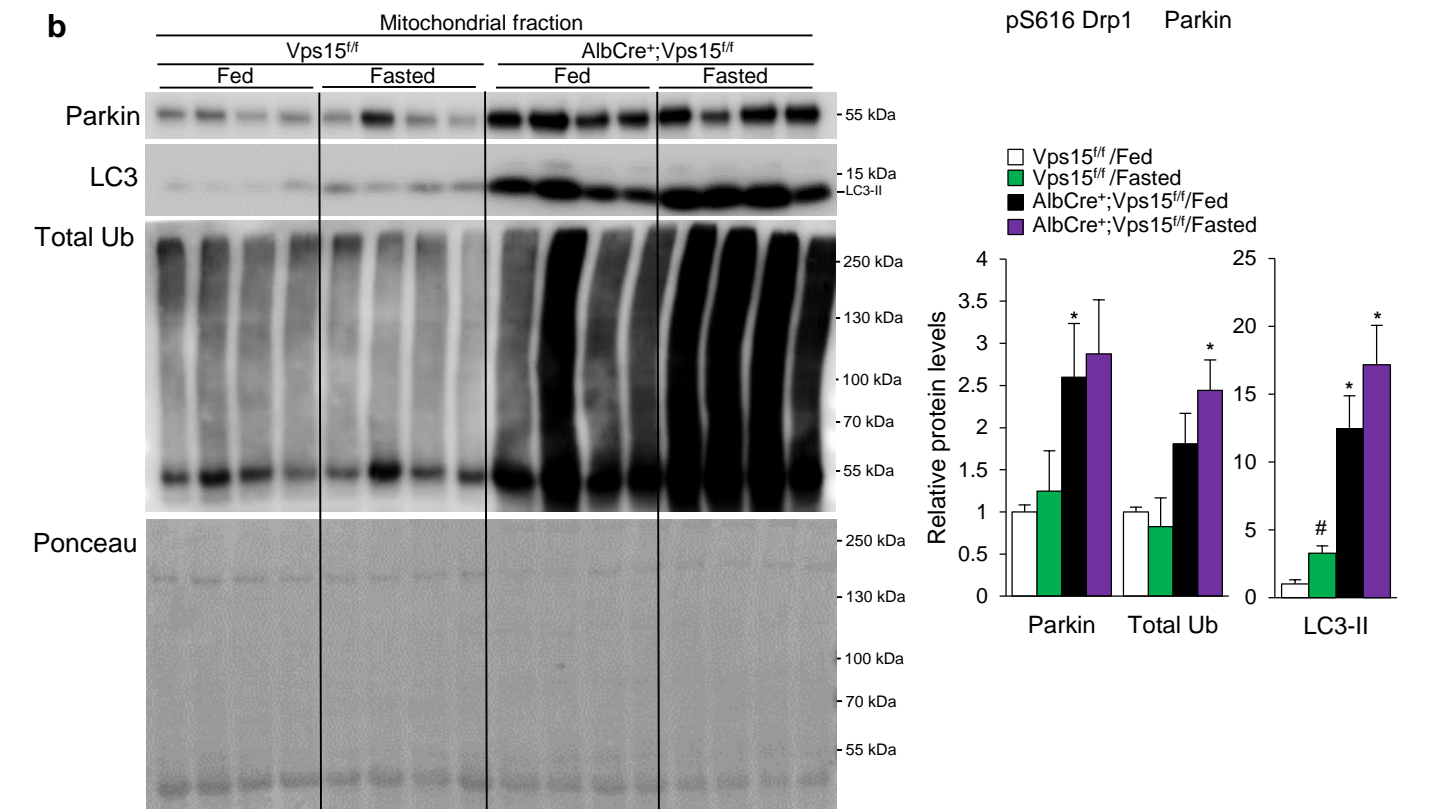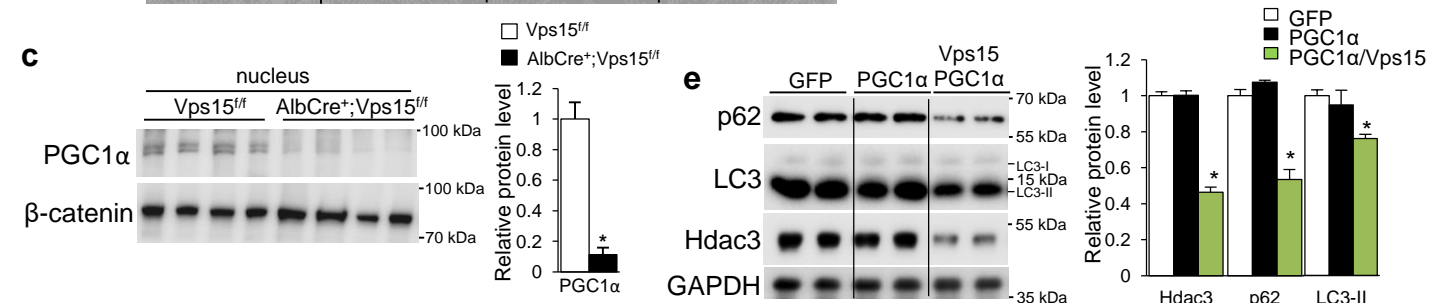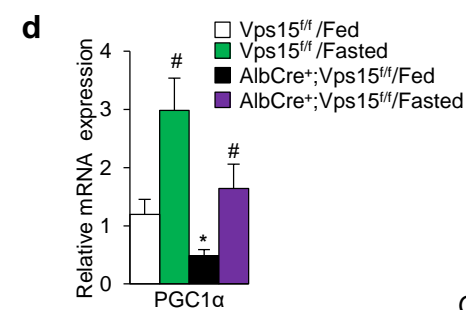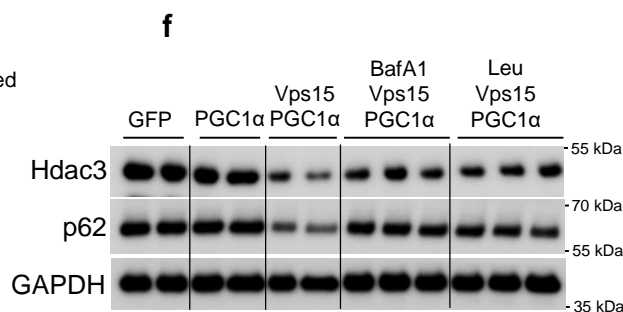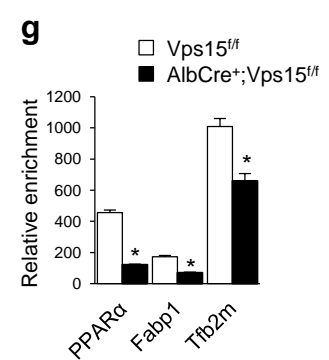

### Supplementary Figure 8. Defective mitochondrial maintenance and PGC1 $\alpha$ expression in Vps15 mutants.

Immunoblot analyses of total liver extracts (a) and mitochondrial fraction (b) of six week old random-fed or 24 hour fasted prior to sacrifice Vps15<sup>ff</sup> and AlbCre<sup>+</sup>;Vps15<sup>ff</sup> mice. Plotted densitometric analyses of normalized phospho-Ser616 Drp1 to total Drp1 and Parkin to GAPDH levels in total extracts; and Parkin, total ubiquitin and LC3-II levels to total ponceau signal presented as folds over Vps15<sup>ff</sup> fed condition (right panel). Data are means  $\pm$ SEM (n=4 for Vps15<sup>ff</sup> and AlbCre<sup>+</sup>;Vps15<sup>ff</sup>, P<0.05 \*: vs Vps15<sup>ff</sup>, #: vs fed, 2-tailed, unpaired Student's t test). c Immunoblot analysis of nuclear protein liver extracts of random-fed six week old Vps15<sup>ff</sup> and AlbCre<sup>+</sup>;Vps15<sup>ff</sup> using indicated antibodies. Densitometric analyses of PGC1 $\alpha$  protein levels normalised to  $\beta$ -catenin levels presented as folds over Vps15<sup>ff</sup> condition (right panel). Data are means  $\pm$ SEM (n=4 for Vps15<sup>ff</sup> and AlbCre<sup>+</sup>;Vps15<sup>ff</sup>, P<0.05 \*: vs Vps15<sup>ff</sup>, 2-tailed, unpaired Student's t test). d Relative transcript levels of PGC1 $\alpha$  in the livers of six week old random-fed or 24 hour fasted prior to sacrifice Vps15<sup>ff</sup> and AlbCre<sup>+</sup>;Vps15<sup>ff</sup> mice. Data are means  $\pm$ SEM (n=4 for Vps15<sup>ff</sup>, n=6 for AlbCre<sup>+</sup>;Vps15<sup>ff</sup>, P<0.05 \*: vs Vps15<sup>ff</sup>, #: vs fed, 2-tailed, unpaired Student's t test). e Immunoblot analysis using indicated antibodies of total protein extracts of primary hepatocytes 36 hours post-transduction with indicated adenoviral vectors. Densitometric analyses of protein levels normalised to GAPDH levels presented as folds over GFP-infected cells. Data are means  $\pm$ SEM (n=3 independent hepatocyte cultures, P<0.05 \*: vs GFP, 2-tailed, unpaired Student's t test). f Immunoblot analysis of total protein extracts of primary hepatocytes transduced with indicated adenoviral vectors. 12 hours post-transduction PGC1 $\alpha$ +Vps15 infected cells were treated for additional 24 hours with vehicle, Leupeptin or BafA1. All cells were collected at the same time and the cytosolic extracts were prepared for further immunoblot analyses. Immunoblot with anti-GAPDH antibody served as a loading control. g Livers of six week old random-fed Vps15<sup>ff</sup> and AlbCre<sup>+</sup>;Vps15<sup>ff</sup> were subjected to chromatin immunoprecipitation with anti-H3K27Ac antibody followed by qPCR analyses using primers nested around PPAR $\alpha$ -responsive elements in promoter regions of indicated genes. Data are presented as relative enrichment in anti-H3K27Ac samples to immunoprecipitation with nonspecific IgG. Data are means  $\pm$ SEM, n=4, P<0.05 \*: vs wild-type mice, 2-tailed, unpaired Student's t-test.

## Supplementary Table 1. Primer sequences used for qPCR analyses

### ChIP

| Primer name    | Sequence               |
|----------------|------------------------|
| Tfam_ppre1_S   | CAACTTGTTTGAGTTGGTTCTC |
| Tfam_ppre1_AS  | AATAGAAAGGAATGAGGGTTCC |
| Tfam_ppre2_S   | GACCTAGCCAAACCAAAGAG   |
| Tfam_ppre2_AS  | CTTCCTGTCACCTTCTACCT   |
| Tfb2m_ppre1_S  | GGACCTAGAATGCAAGATG    |
| Tfb2m_ppre1_AS | GGTGTGGAGGTGGACTTT     |
| Tfb2m_ppre2_S  | AAACAGGAGATCCGAGAGG    |
| Tfb2m_ppre2_AS | CGGATGCCCAGGTAAGA      |
| Ppara_ppre_S   | CAGTAGGCAAGTAGGGAATG   |
| Ppara_ppre_AS  | AAACCCACCTTTGCTGAT     |
| FABP1_ppre_S   | ACAAACCTCTGCCTTGCCCA   |
| FABP1_ppre_AS  | CAACGAGGCTTCCTTCCACA   |

### qPCR

| Primer name | Sequence                     |
|-------------|------------------------------|
| Aox_S       | GGGAGTGCTACGGGTTACATG        |
| Aox_AS      | CCGATATCCCCAACAGTGATG        |
| ATP6_S      | CCTTCCACAAGGAACTCCAATTTCCAC  |
| ATP6_AS     | CTAGAGTAGCTCCTCCGATTAGGTG    |
| ATP8_S      | ATGCCACAACACTAGATACATCAACATG |
| ATP8_AS     | GTGATTTTGGTGAAGGTGCCAGTGG    |
| Cpt1_S      | TGGGACTGGTTCGATTGCATC        |
| Cpt1_AS     | TCAGGGTTTGTCCGAAGAAGAA       |
| Cpt2_S      | CAGCACAGCATCGTACCCA          |
| Cpt2_AS     | TCCAATGCCGTTCTCAAAAT         |
| CYTB_S      | CTACTGTTCCGAGTCATAGCCAC      |
| CYTB_AS     | CCAATATATGGGATGGCTGATAGGAG   |
| Fabp1_S     | TCCGCAATGAGTTCACCCTG         |
| Fabp1_AS    | CAGCTTGACGACTGCCTTGA         |
| Gstm2_S     | TTCTTCAGGCCCTCAAAGC          |
| Gstm2_AS    | TGTCCTTGATCAACACCGAA         |
| Gpx7_S      | CTGTGAAGCCACATTCGCTA         |
| Gpx7_AS     | GACTTCAAGCGGTCAACAT          |
| Hdac3_S     | ATGCCTTCAACGTGGGTGAT         |
| Hdac3_AS    | CAGAAGCCAGAGGCCTCAA          |
| Hmgcl_S     | AACTGGTGCAGAAATCTCTAGC       |
| Hmgcl_AS    | GGTTGAATAGCTCAGAACTAGCC      |
| Hmgcs2_S    | GAAGAGAGCGATGCAGGAAAC        |
| Hmgcs2_AS   | GTCCACATATTGGGCTGGAAA        |
| Lcad_S      | TTTCCGGGAGAGTGTAAGGA         |
| Lcad_AS     | ACTTCTCCAGCTTTCTCCCA         |
| Mcad_S      | GATGCATCACCTCGTGTAAC         |
| Mcad_AS     | AAGCCCTTTTCCCCTGAA           |
| Mfn2_S      | CTCCCTTCTTGCCACTGAGG         |
| Mfn2_AS     | ACCACCTGGAGCAAACACTAGC       |
| MTCO1_S     | GCAGGAGCATCAGTAGACCTAAC      |
| MTCO1_AS    | GGAGTTTGATACTGTGTTATGGCTGG   |
| MTCO2_S     | CATAGGGCACCAATGATACTGAAGC    |
| MTCO2_AS    | GCAGAACGACTCGGTTATCAACTTC    |
| Ncor1_S     | TGCGTCAGCTTTCTGTGATTCCACC    |
| Ncor1_AS    | TGATTTCTGCCTCTGCGTTTTCCAT    |

|                   |                           |
|-------------------|---------------------------|
| ND1_S             | CACCTACCCTATCACTCACACTAGC |
| ND1_AS            | GGCTCATCCTGATCATAGAATGGAG |
| ND2_S             | GCATGAGGAGGACTTAACCAAACAC |
| ND2_AS            | GAGGTTGAGTAGAGTGAGGGATGG  |
| ND4_S             | CACAACACACACCTTAGACGCTTC  |
| ND4_AS            | CAGCAATTGGAGCTTCAACATGGG  |
| Nqo1_S            | AGCGTTCGGTATTACGATCC      |
| Nqo1_AS           | AGTACAATCAGGGCTCTTCTCG    |
| Pex5_S            | GTGGGCAGCAGAGTTTATACAG    |
| Pex5_AS           | CTCCCTCCTCAAGTCGATGC      |
| Polg_S            | GCAGGAACAGTTAGTGGTGGG     |
| Polg_AS           | GCTCATAGTATCGAGAAAACGCA   |
| Polrmt_S          | TGGGCGCAAAGCTAGAGG        |
| Polrmt_AS         | GTGAAGGGTCCAGAACTCCTG     |
| Tert1_S           | CTAGCTCATGTGTCAAGACCCTCTT |
| Tert1_AS          | GCCAGCACGTTTCTCTCGTT      |
| Tfam_S            | ATTCCGAAGTGTTTTTCCAGCA    |
| Tfam_AS           | TCTGAAAGTTTTGCATCTGGGT    |
| Tfb1m_S           | CGGGAGATCATTAAAGTTGTTCCG  |
| Tfb1m_AS          | GCCCAGGACCCACTTCATAAA     |
| Tfb2m_S           | CGGAACTGATAGCGACTCCT      |
| Tfb2m_AS          | CACACTAAATGACGACCAAGGTT   |
| Vlcad_S           | CCGGTTCCTTTGAGGAAGTGAA    |
| Vlcad_AS          | AGTGTGTCCTCCACCTTCTC      |
| Vps15_S           | CCTGGTGGTTGTGAAGGTCT      |
| Vps15_AS          | AGCGTTCTCGATGTTGTTT       |
| Vps34_S           | CCTGGACATCAACGTGCAG       |
| Vps34_AS          | TGTCTCTTGGTATAGCCAGAAA    |
| PPAR $\alpha$ _S  | AGAGCCCCATCTGTCCTCTC      |
| PPAR $\alpha$ _AS | ACTGGTAGTCTGCAAAACCAAA    |
| Pinin_S           | ACCTGGAAGGGGCAGTCAGTA     |
| Pinin_AS          | ATCATCGTCTTCTGGGTCGCT     |
| b-actin_S         | GTGACGTTGACATCCGTAAAGA    |
| b-actin_AS        | GCCGGACTCATCGTACTCC       |
| Cyclophilin_S     | CAGGTCCTGGCATCTTGTCC      |
| Cyclophilin_AS    | TTGCTGGTCTTGCCATTCTT      |
| Ef1a1_S           | GCAGCAACAATCAGGACAGC      |
| Ef1a1_AS          | GACATCTCCCTGTGGAAATTCG    |
| Gapdh_S           | TGACCACAGTCCATGCCATC      |
| Gapdh_AS          | GACGGACACATTGGGGGTAG      |
| 18s_S             | AGTCCCTGCCCTTTGTACACA     |
| 18s_AS            | CGATCCGAGGGCCTCACTA       |
| 26s_S             | CCTGCTATCTCAGAACCGAGT     |
| 26s_AS            | CCATGAGGTATTGTTGAGGGAA    |
| H2az_S            | AAGCGTATCACCCCTCGTCA      |
| H2az_AS           | AGCGATTTGTGGATGTGTGG      |
| 36b4_S            | TCCAGGCTTTGGGCATCA        |
| 36b4_AS           | CTTTATCAGCTGCACATCACTCAGA |



## Uncropped blots Figure 1e

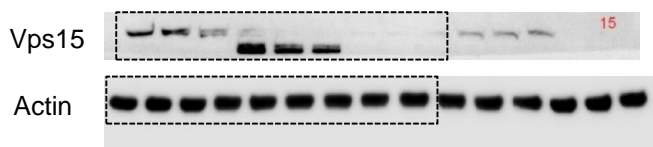

## Uncropped blots Figure 2f

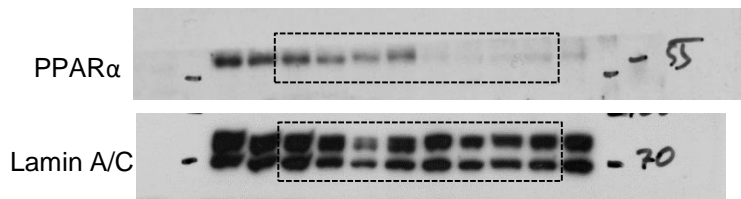

# Uncropped blots Figure 3

3b

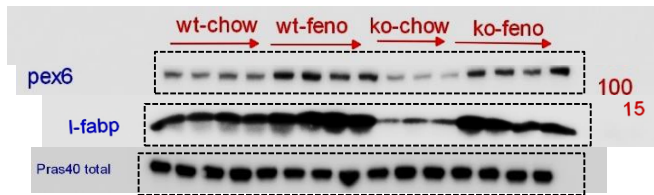

3e

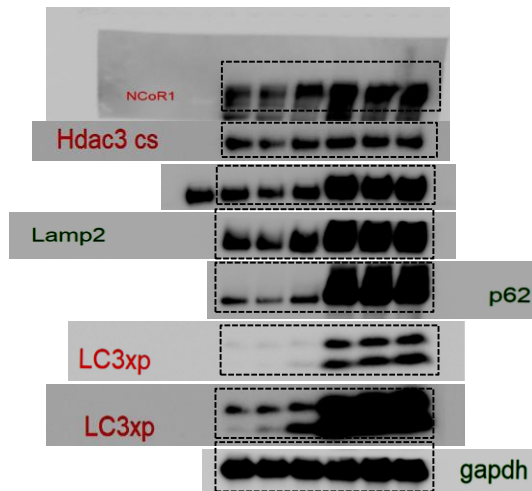

3f

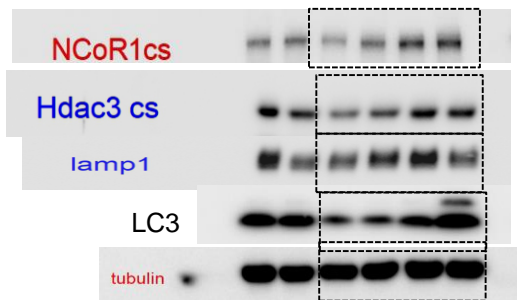

3g

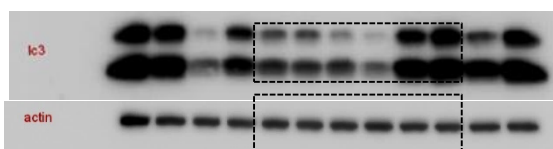

# Uncropped blots Figure 4

4b

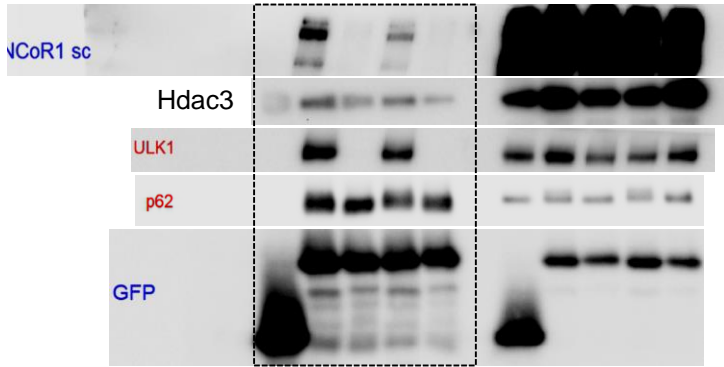

4c

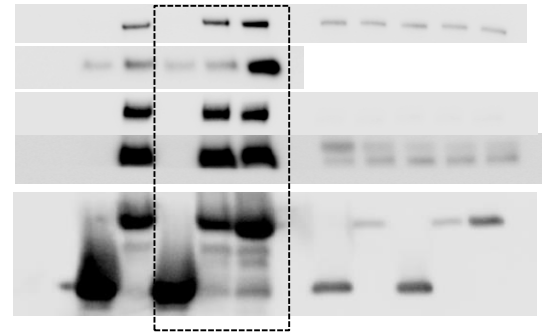

4d

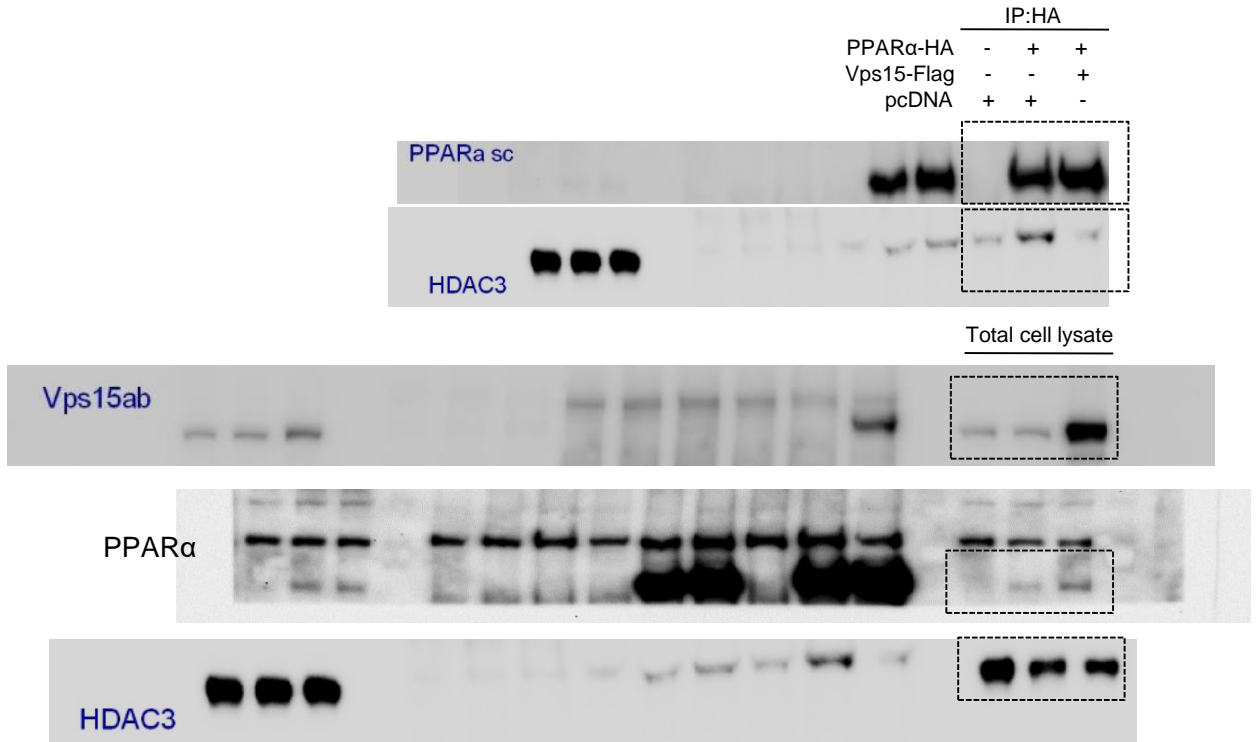

# Uncropped blots Figure 5

5b

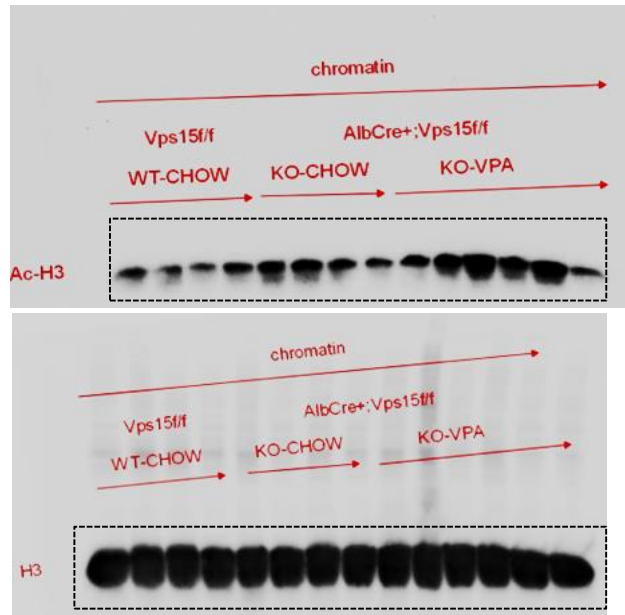

5d

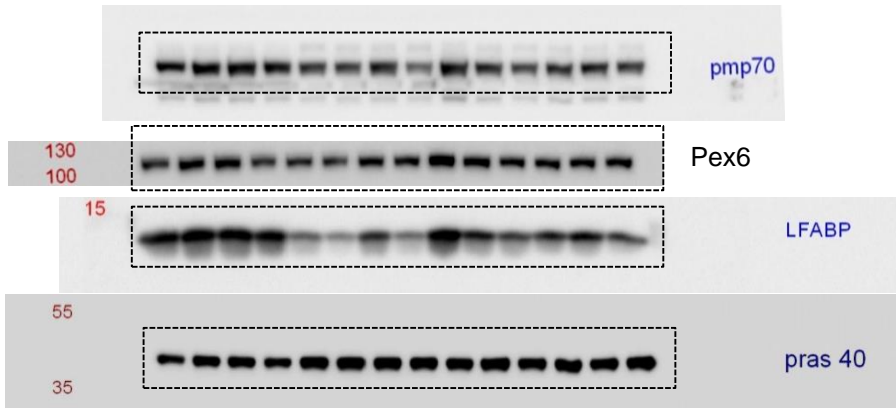

## Uncropped blots Figure 6b

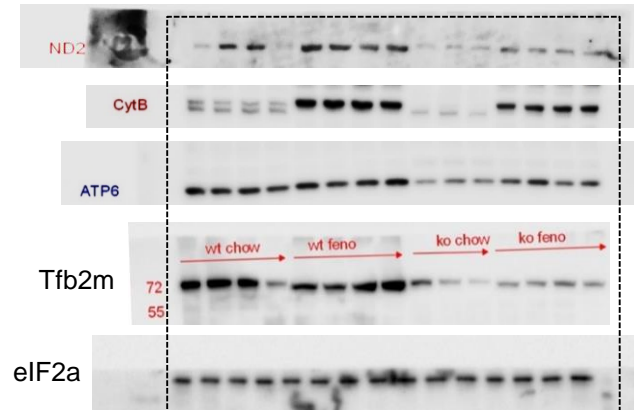

## Uncropped blots Figure 7f

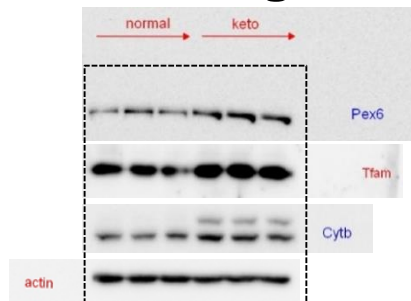

Supplement: 41467_2019_9598_MOESM1_ESM.pdf [file 41467_2019_9598_MOESM1_ESM.pdf]
